# Supplementary material
Source: ML conference proceedings conference paper supplement (https://openreview.net/forum?id=SQP1H9Jy8W)
Supplement: supplementary_material [file attachment]

# Leveraging Locality and Robustness to Achieve Massively Scalable Gaussian Process Regression

Anonymous Author(s)

Affiliation

Address

email

## A Theoretical GPnn Results

### A.1 Preliminary results

Let  $\rho(\mathbf{x}, \mathbf{x}') = \sigma_f \sqrt{1 - c(\mathbf{x}/l, \mathbf{x}'/l)}$  be the kernel-induced distance function over  $\mathbb{R}^d$  ([17]). We define  $\mathbf{x}_{(j,n)}(\mathbf{x}^*)$  as the  $j^{\text{th}}$  nearest-neighbour random variable to a test point  $\mathbf{x}^*$  under  $\rho$ , which we abbreviate to  $\mathbf{x}_{(j)}$  when the context is clear, and  $\mathbf{x}_{(j)}(\mathbf{x}^*) \in N_m(\mathbf{x}^*)$  as the realised  $j^{\text{th}}$  nearest-neighbour of the test point  $\mathbf{x}^*$  from a training set  $X$ . From this we define  $\epsilon_i = \rho^2(\mathbf{x}_{(i)}, \mathbf{x}^*)$  and  $\epsilon_{ij} = \rho^2(\mathbf{x}_{(i)}, \mathbf{x}_{(j)})$ .

**Definition 8** (Support). Let  $P_{\mathbf{x}}$  be the probability measure of  $\mathbf{x}$  and  $S_{\mathbf{x},\epsilon}^{\rho}$  the closed ball of radius  $\epsilon > 0$  under the metric  $\rho$  centred at  $\mathbf{x}$ . Then we define  $\text{support}(P_{\mathbf{x}}) = \{\mathbf{x} : P_{\mathbf{x}}(S_{\mathbf{x},\epsilon}^{\rho}) > 0 \forall \epsilon > 0\}$ .

**Definition 9** (Weakly-faithful). We define a pair of metrics  $\rho(\cdot, \cdot), \hat{\rho}(\cdot, \cdot)$  to be weakly-faithful w.r.t. each other if the following condition holds: The  $m^{\text{th}}$  nearest-neighbour under  $\hat{\rho}$  converges to the test point as  $n \rightarrow \infty$  if and only if the  $m^{\text{th}}$  nearest-neighbour under  $\rho$  converges to the test point in the limit.

### Assumptions

(A1)  $\mathbf{x} \stackrel{\text{iid}}{\sim} P_{\mathbf{x}}$  and  $\mathbf{x}^* \in \text{support}(P_{\mathbf{x}})$  under the generative metric defined by  $c(\cdot, \cdot)$ .

(A2)  $c(\cdot, \cdot), \hat{c}(\cdot, \cdot)$  are stationary kernels whose induced distance functions are weakly faithful metrics (Definition 9).

(A3)  $y_i = f(\mathbf{x}_i) + \xi_i$  with  $\xi_i \stackrel{\text{iid}}{\sim} P_{\xi}$ ,  $f(\mathbf{x}) \sim \mathcal{WSRF}(\sigma_f^2 c(\cdot/l, \cdot/l))$  and  $y_i | f(\mathbf{x}_i) \sim P_{\xi}$  and  $\mathbb{E}[\xi] = 0, \mathbb{E}[\xi^2] = \sigma_{\xi}^2$ .

**Note:** Assumption (A2) is not overly restrictive and encompasses commonly used kernels such as all those mentioned in this paper.

**Lemma 10.**  $\epsilon_i \rightarrow 0$  and  $\epsilon_{ij} \rightarrow 0$  as  $n \rightarrow \infty$  a.e. with respect to the measure over  $\mathbf{x} \in \mathbb{R}^d, P_{\mathbf{x}}$ , for  $i, j \leq m, \frac{m}{n} \rightarrow 0$  and under (A1-2).

*Proof.* Lemma 6.1 of [9] states that  $\|\mathbf{x}_{(m,n)}(\mathbf{x}) - \mathbf{x}\| \xrightarrow{n \rightarrow \infty} 0$  with probability one (with respect to  $P_{\mathbf{x}}$ ). Their proof can be generalised immediately to state that  $\rho(\mathbf{x}_{(m,n)}(\mathbf{x}), \mathbf{x}) \xrightarrow{n \rightarrow \infty} 0$  by using our definition of support, 8, that directly invokes the metric  $\rho$ . Hence  $\epsilon_i \rightarrow 0$  for all  $i \leq m$  (since  $\mathbf{x}^*$  is in  $\text{support}(P_{\mathbf{x}})$ ). Since  $\rho$  is a metric it satisfies the triangle inequality; hence  $\rho(\mathbf{x}_{(i)}, \mathbf{x}_{(j)}) \leq \rho(\mathbf{x}_{(i)}, \mathbf{x}^*) + \rho(\mathbf{x}_{(j)}, \mathbf{x}^*) \xrightarrow{n \rightarrow \infty} 0$  for all  $i, j \leq m$ .  $\square$

**Lemma 11.** For an  $m$ -GPnn under the assumptions (A1-3),

$$\lim_{n \rightarrow \infty} \mathbf{k}_N^{*T} K_N^{-1} \mathbf{k}_N^* = \sigma_f^2 - \sigma_{\xi}^2 m^{-1} + \mathcal{O}(m^{-2}).$$

394 *Proof.* From Lemma 10 we have that  $\lim_{n \rightarrow \infty} k(\mathbf{x}_{(j)}(\mathbf{x}^*), \mathbf{x}^*) = \lim_{n \rightarrow \infty} (\sigma_f^2 - \epsilon_i) = \sigma_f^2$  and  
 395  $\lim_{n \rightarrow \infty} k(\mathbf{x}_{(i)}(\mathbf{x}^*), \mathbf{x}_{(j)}(\mathbf{x}^*)) = \lim_{n \rightarrow \infty} (\sigma_f^2 - \epsilon_{ij}) = \sigma_f^2$ . As a result,  $\mathbf{k}_N^* \rightarrow \sigma_f^2 \mathbf{1}$  and

$$K^\infty := \lim_{n \rightarrow \infty} K_N = \sigma_\xi^2 I + \sigma_f^2 \mathbf{1} \mathbf{1}^T. \quad (8)$$

396 Now using Sherman-Morrison and the continuity of matrix inverse and matrix-matrix products:

$$(A + \mathbf{b} \mathbf{c}^T)^{-1} = A^{-1} - \frac{A^{-1} \mathbf{b} \mathbf{c}^T A^{-1}}{1 + \mathbf{c}^T A^{-1} \mathbf{b}} \quad (9)$$

$$(K^\infty)^{-1} = (\sigma_\xi^2 I + \sigma_f^2 \mathbf{1} \mathbf{1}^T)^{-1} = \frac{1}{\sigma_\xi^2} \left( I - \sigma_f^2 \frac{\mathbf{1} \mathbf{1}^T}{\sigma_\xi^2 + \sigma_f^2 \mathbf{1}^T \mathbf{1}} \right) \quad (10)$$

$$\begin{aligned} \mathbf{1}^T (K^\infty)^{-1} \mathbf{1} &= \frac{m}{\sigma_\xi^2} \left( 1 - \frac{m \sigma_f^2}{\sigma_\xi^2 + m \sigma_f^2} \right) \\ &= \frac{m}{\sigma_\xi^2} \left( 1 - m \sigma_f^2 \frac{1}{m \sigma_f^2} \left( 1 - \frac{\sigma_\xi^2}{m \sigma_f^2} + \frac{\sigma_\xi^4}{m^2 \sigma_f^4} - \mathcal{O}(m^{-3}) \right) \right) \\ &= \frac{1}{\sigma_f^2} - \frac{\sigma_\xi^2}{m \sigma_f^4} + \mathcal{O}(m^{-2}). \end{aligned} \quad (11)$$

397 Thus,

$$\lim_{n \rightarrow \infty} \mathbf{k}_N^{*T} K_N^{-1} \mathbf{k}_N^* = \sigma_f^4 \mathbf{1}^T (K^\infty)^{-1} \mathbf{1} = \sigma_f^2 - \sigma_\xi^2 m^{-1} + \mathcal{O}(m^{-2}). \quad (12)$$

398 □

399 **Lemma 12** ( $\mathcal{WSRF}$  expectations). *Under (A3),  $\mathbb{E}_{\mathbf{y}, \mathbf{y}^*} \{\mathbf{y} \mathbf{y}^*\} = \mathbf{k}^*$  and  $\mathbb{E}_{\mathbf{y}} \{\mathbf{y} \mathbf{y}^T\} = K$ .*

400 *Proof.* By assumption on the covariance properties of  $y$  and the independence and zero-mean of  
 401 the additive noise,  $\mathbb{E}_{\mathbf{y}} \{y_i y_j\} = k(\mathbf{x}_i, \mathbf{x}_j)$ . Extending this to the joint distribution over  $\mathbf{y}, \mathbf{y}^*$  is  
 402 straightforward and gives the results stated. □

403 Lemma 12 is subsequently assumed to be in use throughout A.2.

## 404 A.2 Limit proofs

405 In the following statements only misspecification of type (d) and/or (e) (subsection 4.2) is considered  
 406 to be at work.

407 **Lemma 13** (MSE limit). *Under the assumptions (A1-3), for fixed  $m < \infty$ , the predictive GPnn given  
 408 in subsection 4.1 converges pointwise in the sense of MSE wrt  $P_{\mathbf{x}}$ -a.e. as*

$$\lim_{n \rightarrow \infty} f_n^{\text{MSE}}(\boldsymbol{\theta}) = \sigma_\xi^2 (1 + m^{-1}) - \mathcal{O}(m^{-2}).$$

409 *Proof.* This follows from Lemma 11 by expanding the definition of MSE:

$$\begin{aligned} \lim_{n \rightarrow \infty} f_n^{\text{MSE}}(\boldsymbol{\theta}) &= \lim_{n \rightarrow \infty} \mathbb{E}_{\mathbf{y}, \mathbf{y}^*} \left\{ |y^* - \mu_N^*|^2 \right\} \\ &= \lim_{n \rightarrow \infty} \left[ \mathbb{E}_{\mathbf{y}^*} \{y^{*2}\} + \mathbb{E}_{\mathbf{y}} \{\mu_N^{*2}\} - 2 \mathbb{E}_{\mathbf{y}, \mathbf{y}^*} \{\mathbf{k}_N^{*T} K_N^{-1} \mathbf{y}_N y^*\} \right] \\ &= \sigma_f^2 + \sigma_\xi^2 - \lim_{n \rightarrow \infty} \mathbb{E}_{\mathbf{y}} \{\mu_N^{*2}\} \\ &= \sigma_\xi^2 (1 + m^{-1}) - \mathcal{O}(m^{-2}). \end{aligned}$$

410 Since  $\mathbb{E}_{\mathbf{y}} \{\mu_N^{*2}\} = \mathbb{E}_{\mathbf{y}} \{\mathbf{k}_N^{*T} K_N^{-1} \mathbf{y}_N \mathbf{y}_N^T K_N^{-1} \mathbf{k}_N^*\} = \mathbf{k}_N^{*T} K_N^{-1} \mathbf{k}_N^*$ , and by assumption  
 411  $\mathbb{E}_{\mathbf{y}, \mathbf{y}^*} \{\mathbf{y}_N \mathbf{y}^*\} = \mathbf{k}_N^*$ , even under a  $\mathcal{WSRF}$  generative model (Lemma 12). □

**Corollary 14** (NLL limit).

$$\lim_{n \rightarrow \infty} f_n^{\text{NLL}}(\boldsymbol{\theta}) = \frac{1}{2} \log(\sigma_\xi^2 (1 + m^{-1})) + \frac{1}{2} + \frac{1}{2} \log 2\pi - \mathcal{O}(m^{-2}).$$

412 *Proof.* The proof follows straightforwardly from Lemma 11 and because  $\sigma_N^{*2} = \sigma_f^2 + \sigma_\xi^2 -$   
 413  $\mathbf{k}_N^{*T} K_N^{-1} \mathbf{k}_N^*$ .

$$\begin{aligned}
 2 \mathbb{E}_{\mathbf{y}, \mathbf{y}^*} \{l_N^*\} &= \mathbb{E}_{\mathbf{y}, \mathbf{y}^*} \left\{ \log \sigma_N^{*2} + \frac{(y^* - \mu_N^*)^2}{\sigma_N^{*2}} + \log 2\pi \right\} \\
 &= \log \sigma_N^{*2} + 1 + \log 2\pi \\
 \lim_{n \rightarrow \infty} 2 \mathbb{E}_{\mathbf{y}, \mathbf{y}^*} \{l_N^*\} &= \log(\sigma_f^2 + \sigma_\xi^2 - (\sigma_f^2 - \sigma_\xi^2 m^{-1} + \mathcal{O}(m^{-2}))) + 1 + \log 2\pi \\
 &= \log(\sigma_\xi^2(1 + m^{-1}) - \mathcal{O}(m^{-2})) + 1 + \log 2\pi \\
 &= \log \sigma_\xi^2 + m^{-1} + 1 + \log 2\pi - \mathcal{O}(m^{-2}).
 \end{aligned}$$

414 □

### 415 A.2.1 Full misspecification

416 For the remainder of A.2 we assume that the full range of possible misspecifications ((a)-(e)) outlined  
 417 in subsection 4.2 are in action. We refer to this case as “fully-misspecified” and introduce the notation  
 418  $\hat{\mu}_N^*, \hat{\sigma}_N^{*2}$  to be understood to mean the predictive mean and variance under these misspecifications.

419 **Lemma 15** (Fully misspecified MSE limit). *For a fully misspecified model, asymptotically*

$$\lim_{n \rightarrow \infty} f_n^{\text{MSE}}(\hat{\theta}) = \sigma_\xi^2(1 + m^{-1}) - \mathcal{O}(m^{-2}).$$

420 *provided the misspecified kernel distance metric is weakly faithful in the sense that the  $m^{\text{th}}$  nearest-*  
 421 *neighbour converges under both the true and misspecified metrics (Definition 9).*

*Proof.*

$$\begin{aligned}
 \mathbb{E}_{\mathbf{y}} \left\{ \mathbb{E}_{\mathbf{y}^*} [(y^* - \hat{\mu}_N^*)^2 | \mathbf{y}] \right\} &= \mathbb{E}_{\mathbf{y}} \left\{ \mathbb{E}_{\mathbf{y}^*} [y^{*2} - 2y^* \hat{\mu}_N^* + (\hat{\mu}_N^*)^2 | \mathbf{y}] \right\} \\
 &= \mathbb{E}_{\mathbf{y}} \{ \sigma_N^{*2} + \mu_N^{*2} - 2\mu_N^* \hat{\mu}_N^* + (\hat{\mu}_N^*)^2 \} \\
 &= \underbrace{\sigma_N^{*2}}_{(a)} + \underbrace{\mathbf{k}_N^{*T} K_N^{-1} \mathbf{k}_N^*}_{(b)} - 2 \underbrace{\mathbf{k}_N^{*T} \hat{K}_N^{-1} \hat{\mathbf{k}}_N^*}_{(c)} + \underbrace{\hat{\mathbf{k}}_N^{*T} \hat{K}_N^{-1} K_N \hat{K}_N^{-1} \hat{\mathbf{k}}_N^*}_{(d)}.
 \end{aligned}$$

422 We can use standard results to state that (a) + (b) =  $\sigma_f^2 + \sigma_\xi^2$ . Then we define  $\hat{\gamma} = \frac{\hat{\sigma}_f^2}{\hat{\sigma}_\xi^2 + m\hat{\sigma}_f^2}$  and  
 423 expand it in terms of  $m^{-1}$ :

$$1 - m\hat{\gamma} = \frac{\hat{\sigma}_\xi^2}{m\hat{\sigma}_f^2} - \frac{\hat{\sigma}_\xi^4}{m^2\hat{\sigma}_f^4} + \mathcal{O}(m^{-3}).$$

424 In a manner similar to Lemma 11 we use this result to compute:

$$\begin{aligned}
 \lim_{n \rightarrow \infty} (c) &= \sigma_f^2 \mathbf{1}^T \hat{\sigma}_\xi^{-2} (I - \hat{\gamma} \mathbf{1} \mathbf{1}^T) \mathbf{1} \hat{\sigma}_f^2 \\
 &= \frac{\sigma_f^2 \hat{\sigma}_f^2}{\hat{\sigma}_\xi^2} m(1 - m\hat{\gamma}) \\
 &= \frac{\sigma_f^2 \hat{\sigma}_f^2}{\hat{\sigma}_\xi^2} \left( \frac{\hat{\sigma}_\xi^2}{\hat{\sigma}_f^2} - \frac{\hat{\sigma}_\xi^4}{m\hat{\sigma}_f^4} \right) + \mathcal{O}(m^{-2}) \\
 &= \sigma_f^2 - \frac{\sigma_f^2 \hat{\sigma}_\xi^2}{m\hat{\sigma}_f^2} + \mathcal{O}(m^{-2})
 \end{aligned}$$

425 and

$$\begin{aligned}
\lim_{n \rightarrow \infty} (d) &= \frac{\hat{\sigma}_f^4}{\hat{\sigma}_\xi^4} \mathbf{1}^T (I - \hat{\gamma} \mathbf{1} \mathbf{1}^T) (\sigma_\xi^2 I + \sigma_f^2 \mathbf{1} \mathbf{1}^T) (I - \hat{\gamma} \mathbf{1} \mathbf{1}^T) \mathbf{1} \\
&= \frac{\hat{\sigma}_f^4}{\hat{\sigma}_\xi^4} \mathbf{1}^T [\sigma_\xi^2 I + \sigma_f^2 \mathbf{1} \mathbf{1}^T - 2\sigma_\xi^2 \hat{\gamma} \mathbf{1} \mathbf{1}^T + \hat{\gamma}^2 \sigma_\xi^2 m \mathbf{1} \mathbf{1}^T - 2\sigma_f^2 \hat{\gamma} m \mathbf{1} \mathbf{1}^T + \sigma_f^2 \hat{\gamma}^2 m^2 \mathbf{1} \mathbf{1}^T] \mathbf{1} \\
&= \frac{\hat{\sigma}_f^4}{\hat{\sigma}_\xi^4} m (\sigma_\xi^2 + m \sigma_f^2) [1 - 2m\hat{\gamma} + m^2 \hat{\gamma}^2] \\
&= \frac{\hat{\sigma}_f^4}{\hat{\sigma}_\xi^4} m (\sigma_\xi^2 + m \sigma_f^2) (1 - m\hat{\gamma})^2 \\
&= \frac{\hat{\sigma}_f^4}{\hat{\sigma}_\xi^4} m (\sigma_\xi^2 + m \sigma_f^2) \left( \frac{\hat{\sigma}_\xi^4}{m^2 \hat{\sigma}_f^4} - 2 \frac{\hat{\sigma}_\xi^6}{m^3 \hat{\sigma}_f^6} + \mathcal{O}(m^{-4}) \right) \\
&= \sigma_f^2 + \frac{\sigma_\xi^2}{m} - 2 \frac{\sigma_f^2 \hat{\sigma}_\xi^2}{\hat{\sigma}_f^2 m} - \mathcal{O}(m^{-2}),
\end{aligned}$$

426 where we have used the expansion of  $1 - m\hat{\gamma}$  given earlier. Putting these results together gives

$$\begin{aligned}
\lim_{n \rightarrow \infty} f_n^{\text{MSE}}(\hat{\boldsymbol{\theta}}) &= \lim_{n \rightarrow \infty} [(a) + (b) - 2(c) + (d)] \\
&= \sigma_f^2 + \sigma_\xi^2 - 2 \left( \sigma_f^2 - \frac{\sigma_f^2 \hat{\sigma}_\xi^2}{m \hat{\sigma}_f^2} \right) + \sigma_f^2 + \frac{\sigma_\xi^2}{m} - 2 \frac{\sigma_f^2 \hat{\sigma}_\xi^2}{\hat{\sigma}_f^2 m} - \mathcal{O}(m^{-2}) \\
&= \sigma_\xi^2 (1 + m^{-1}) - \mathcal{O}(m^{-2}).
\end{aligned}$$

427

□

**Lemma 16** (Calibration limit under full misspecification).

$$\lim_{n \rightarrow \infty} f_n^{\text{CAL}}(\hat{\boldsymbol{\theta}}) = \frac{\sigma_\xi^2}{\hat{\sigma}_\xi^2} + \mathcal{O}(m^{-2}).$$

428 *Proof.* We use continuity to write

$$\lim_{n \rightarrow \infty} \mathbb{E}_{\mathbf{y}, \mathbf{y}^*} \left\{ \frac{(y^* - \hat{\mu}_N^*)^2}{\hat{\sigma}_N^{*2}} \right\} = \left( \lim_{n \rightarrow \infty} \frac{1}{\hat{\sigma}_N^{*2}} \right) \left( \lim_{n \rightarrow \infty} f_n^{\text{MSE}}(\hat{\boldsymbol{\theta}}) \right).$$

429 By direct application of Lemma 11  $\hat{\sigma}_N^{*2} \xrightarrow{n \rightarrow \infty} \hat{\sigma}_\xi^2 (1 + m^{-1}) - \mathcal{O}(m^{-2})$  and thus

$$\lim_{n \rightarrow \infty} f_n^{\text{CAL}}(\hat{\boldsymbol{\theta}}) = \frac{\sigma_\xi^2}{\hat{\sigma}_\xi^2} + \mathcal{O}(m^{-2}).$$

430

□

**Corollary 17** (NLL limit under full misspecification).

$$\lim_{n \rightarrow \infty} f_n^{\text{NLL}}(\hat{\boldsymbol{\theta}}) = \frac{1}{2} \log(\hat{\sigma}_\xi^2 (1 + m^{-1})) + \frac{1}{2} \frac{\sigma_\xi^2}{\hat{\sigma}_\xi^2} + \frac{1}{2} \log 2\pi - \mathcal{O}(m^{-2}).$$

431 *Proof.* We start with

$$2f_n^{\text{NLL}}(\hat{\boldsymbol{\theta}}) = \mathbb{E}_{\mathbf{y}, \mathbf{y}^*} \left\{ \log \hat{\sigma}_N^{*2} + \frac{(y^* - \hat{\mu}_N^*)^2}{\hat{\sigma}_N^{*2}} + \log 2\pi \right\}.$$

432 For the second term we use Lemma 16 so that we have

$$\lim_{n \rightarrow \infty} 2f_n^{\text{NLL}}(\hat{\boldsymbol{\theta}}) = \log \hat{\sigma}_\xi^2 + m^{-1} + \frac{\sigma_\xi^2}{\hat{\sigma}_\xi^2} + \log 2\pi - \mathcal{O}(m^{-2}).$$

433

□

434 *Proof of Theorem 1.* We construct the proof using all of the intermediate results given above. In  
435 particular item (i) follows from Lemma 15, item (ii) from Lemma 16 and item (iii) from Corollary 17.  
436

□

## B Parameter Calibration (Proof of Lemma 4)

*Proof of Lemma 4.* (a) Replacing parameters  $\hat{\theta} = (\hat{l}, \hat{\sigma}_\xi^2, \hat{\sigma}_f^2)$  with  $\hat{\theta}' = (\hat{l}, \alpha \hat{\sigma}_\xi^2, \alpha \hat{\sigma}_f^2)$  changes all of the  $\sigma_i^{*2}$  values to  $\alpha \sigma_i^{*2}$  and therefore changes the calibration value on  $C$  from  $\alpha = \frac{1}{c} \sum_{i=1}^c \frac{(y_i^* - \mu_i^*)^2}{\sigma_i^{*2}}$  to  $\alpha/\alpha = 1$ . (b) The NLL on  $C$  arising from parameters  $(\hat{l}, \alpha \hat{\sigma}_\xi^2, \alpha \hat{\sigma}_f^2)$  is  $\frac{1}{2c} \sum_{i=1}^c \{\log(\alpha \hat{\sigma}_\xi^2) + (y_i^* - \mu_i^*)^2 / (\alpha \sigma_i^{*2}) + \log 2\pi\}$  which, on taking first and second derivatives w.r.t.  $\alpha$ , is found to be uniquely minimised by  $\alpha = \frac{1}{c} \sum_{i=1}^c \frac{(y_i^* - \mu_i^*)^2}{\sigma_i^{*2}}$ . (c) It is easily shown that replacing parameters  $(\hat{\sigma}_\xi^2, \hat{\sigma}_f^2)$  by  $(k \hat{\sigma}_\xi^2, k \hat{\sigma}_f^2)$  (for any  $k > 0$ ) in the formula for  $\mu^*$  (Equation 3 and Equation 6) does not alter  $\mu^*$ . Hence the value of  $\text{MSE} = \frac{1}{n^*} \sum_{i=1}^{n^*} (y_i^* - \mu_i^*)^2$  on any size- $n^*$  test set is unchanged when parameters  $\hat{\theta}'$  are used in place of  $\hat{\theta}$ .  $\square$

## C Real world datasets

We consider a variety of datasets from the standard UCI machine learning repository<sup>1</sup>. These datasets are commonly used in the GP literature (see [8] for instance) and are, in principle, easily available online. In practice, we encountered some difficulties: the dataset documentation is often limited; the dataset names commonly used in other published papers do not always match the UCI database naming and important details about data pre-processing, which features to use etc, are often omitted. There are numerous attempts on GitHub and elsewhere at cataloguing these datasets along with any pre-processing, however we had limited success using them, with many appearing unmaintained. Our focus in this work is on testing our methods on a variety of real world datasets and in a way that is, as far as possible, consistent with other papers. We therefore rejected datasets about which there is ambiguity over the correct features to use, or even which column to regress on or for which outlier rejection is required but undocumented elsewhere.

Referring to the datasets used in [8], we were able to locate the following:

- Song (<https://archive.ics.uci.edu/ml/machine-learning-databases/00203/YearPredictionMSD.txt.zip>)
- Bike (<https://archive.ics.uci.edu/ml/machine-learning-databases/00275/Bike-Sharing-Dataset.zip>)
- Poletele ([https://archive.ics.uci.edu/ml/machine-learning-databases/parkinsons/telemonitoring/parkinsons\\_updrs.data](https://archive.ics.uci.edu/ml/machine-learning-databases/parkinsons/telemonitoring/parkinsons_updrs.data))
- Keggdirected ([https://archive.ics.uci.edu/ml/machine-learning-databases/00220/Relation%20Network%20\(Directed\).data](https://archive.ics.uci.edu/ml/machine-learning-databases/00220/Relation%20Network%20(Directed).data))
- Keggundirected ([https://archive.ics.uci.edu/ml/machine-learning-databases/00221/Reaction%20Network%20\(Undirected\).data](https://archive.ics.uci.edu/ml/machine-learning-databases/00221/Reaction%20Network%20(Undirected).data))
- CTSlice ([https://archive.ics.uci.edu/ml/machine-learning-databases/00206/slice\\_localization\\_data.zip](https://archive.ics.uci.edu/ml/machine-learning-databases/00206/slice_localization_data.zip))
- Road3d ([https://archive.ics.uci.edu/ml/machine-learning-databases/00246/3D\\_spatial\\_network.txt](https://archive.ics.uci.edu/ml/machine-learning-databases/00246/3D_spatial_network.txt))
- Protein (<https://archive.ics.uci.edu/ml/machine-learning-databases/00265/CASP.csv>)
- Buzz (<https://archive.ics.uci.edu/ml/machine-learning-databases/00248/regression.tar.gz>)
- HouseElectric (<https://archive-beta.ics.uci.edu/dataset/235/individual+household+electric+power+consumption>)

We were unable to find any documentation on the Kegg datasets to indicate which of the columns should be used as the independent variable (the regressor) and neither is this mentioned in any

<sup>1</sup><https://archive-beta.ics.uci.edu>, accessed April 2023.

literature of which we are aware. Initial runs of standard exact GP training and prediction produced RMSEs much higher than reported in [8]. Combining these two observations, we chose to exclude both Kegg datasets. Likewise we faced problems with Buzz. An analysis of the  $y$  values revealed a small proportion of extremely large outliers that we found could unduly distort performance results (e.g. depending on whether these outliers appeared in the test set for some of the random splits). With the lack of documentation we were unable to identify an outlier rejection scheme that we were confident would be consistent with results quoted in other papers. For this reason we have excluded Buzz.

The choice of  $(\mathbf{x}, y)$  value that we applied for each of the used datasets is as follows:

- Song. The first column is  $y$ , all remaining columns are  $\mathbf{x}$ .
- Bike. We use `hour.csv`. The  $y$  value is `cnt`. `dteday` (the date) is transformed to just be the integer representation of the day. `instant` is just an index so is dropped. `registered` and `casual` are dropped as `registered + casual = cnt`.
- Poletele. The  $y$  value is `total_UPDRS`. The columns `subject#` and `test_time` are not relevant to the problem so are dropped.
- CTSlice.  $y$  value is the final column. The first column is dropped as it is just an index. We additionally drop six columns which are constant over the majority of the dataset, namely columns 59, 69, 179, 189, 279 and 351.
- Road3d.  $y$  value is the final column. The first column is dropped as it is just an index.
- Protein. This dataset was processed as per [https://github.com/hughsalimbeni/bayesian\\_benchmarks](https://github.com/hughsalimbeni/bayesian_benchmarks), whereafter we used our own random (seeded) train/test split.
- HouseElectric.  $y$  value is the column labelled “Global active power”, rescaled by 1000/60 and with “Sub metering 1,2,3” columns subtracted. We convert the date column into day-of-year/365 and the time column into time of day in minutes. Further, we remove any rows with null entries.

We note that although we are using a standard set of real-world datasets, it is not always clear exactly how others in the field have carried out their own preprocessing, limiting the ability to make direct comparisons to other results reported in the literature.

## D Additional Implementation Details

### D.1 Pre-whitening of Data

For all datasets covered in subsection 7.1 the following “whitening” preprocessing step is adopted: Let  $\mathbf{y}$  be the vector of all regressor values in the *training* dataset only, and  $X$  the matrix of all regressands in the *training* dataset only, where each row of  $X$  is a feature. Let  $\mu_y, \sigma_y^2$  be the sample mean and variance of  $\mathbf{y}$  respectively in the training dataset, then the whitened  $y$  values used in both the training and test set are simply  $\sigma_y^{-1}(y - \mu_y)$ . Let  $\mu_X, \Sigma_X$  be the sample mean and covariance matrix of  $X$  respectively. Let  $\Sigma_X = MM^T$ , then the whitened  $x$  values in both the training and test data are  $\frac{1}{\sqrt{d}}M^{-1}(\mathbf{x} - \mu_X)$ , where  $d$  is the feature dimension of  $X$ . **Note:** the performance metrics given in subsection 7.1 are expressed in terms of the whitened  $y$  values rather than the  $y$  values in their original form. This appears to be common practice in the literature and has no bearing on the *comparative* performance of the different methods within this paper.

### D.2 Test-Set Batching

To prevent excessive memory consumption, we perform all predictions for the distributed and variational methods in batches of 1000 points at a time. Where this is not possible (e.g. for especially large datasets), we use smaller batches of 500 or 250 points, as appropriate.

### D.3 Additional Implementation Details for SVGP

We use the sparse variational inducing point approach of [11], following the implementation provided by GPyTorch, which in particular uses a Cholesky decomposition to parameterise the

529 covariance matrix of the variational prior. We broadly follow the SVGP implementation exam-  
 530 ple provided by [https://docs.gpytorch.ai/en/stable/examples/04\\_Variational\\_and\\_](https://docs.gpytorch.ai/en/stable/examples/04_Variational_and_Approximate_GPs/SVGP_Regression_CUDA.html)  
 531 [Approximate\\_GPs/SVGP\\_Regression\\_CUDA.html](https://docs.gpytorch.ai/en/stable/examples/04_Variational_and_Approximate_GPs/SVGP_Regression_CUDA.html). In particular, we follow their example in us-  
 532 ing the Adam optimiser to train our model over 100 epochs with a minibatch size of 1024 and a  
 533 learning rate of 0.01. We opt to use 1024 inducing points. All experiments under this method are  
 534 run on a SageMaker ml.p3.2xlarge instance, consisting of a single Tesla V100 GPU with 16GB of  
 535 memory.

#### 536 **D.4 Additional Implementation Details for Distributed methods**

537 A good introduction to distributed methods for Gaussian process inference is [7]. Here we run  
 538 the product-of-experts (PoE) [12], generalised product-of-experts (gPoE) [2], Bayesian committee  
 539 machine (BCM) [24], robust Bayesian committee machine (rBCM) [7] and generalised robust  
 540 Bayesian committee machine (GrBCM) [13] following the recommendation in [4] to aggregate in  
 541  $f$ -space. There are three components to any distributed method: the hyperparameter inference, the  
 542 *partitioner* and the *aggregator*. Hyperparameter estimation is the same for all of the methods: we use  
 543 the method in section 3.1 of [7], randomly partitioning the entire training set into subsets of size 625  
 544 (or as close as possible with equal-sized experts given that in general  $n$  is not a multiple of 625). A  
 545 block diagonal approximation (with  $n/625$  blocks) is then used to approximate to the full  $n \times n$  gram  
 546 kernel matrix. To recover hyperparameters with this we use Gaussian Process models with a zero  
 547 prior mean and a scaled square-exponential kernel. Training is conducted using the Adam optimiser  
 548 with a learning rate of 0.1 over 100 optimiser iterations. Once the hyperparameters are trained, we  
 549 run our distributed prediction mechanism to evaluate performance against the test-set. The 625-sized  
 550 partitioned blocks are referred to as “experts” and the shared hyperparameter values are distributed to  
 551 each expert and held fixed thereafter. In the *aggregator*, or distributed prediction phase, each expert  
 552 produces an individual predictive distribution and these are then aggregated to a final predictive mean  
 553 and variance for each of our test points. GRBCM prediction is a little more complex than this as it  
 554 makes use of an additional “communications” expert as explained in [13], aggregating in  $f$ -space as  
 555 recommended in [4]. We provide timing statistics for training these models.

556 We use our own GPyTorch-based implementation of distributed GP approximations. All exact GP  
 557 calculations are performed using GPyTorch using the default settings (so 20 Lanczos iterations  
 558 throughout and a CG tolerance of 1 for hyperparameter inference, and  $10^{-3}$  for posterior predictions).  
 559 For all of our experiments, we utilise an AWS t3.2xlarge instance (consisting of 8 Intel Skylake  
 560 Processors and 32 GB of RAM).

561 **E Further simulation results**

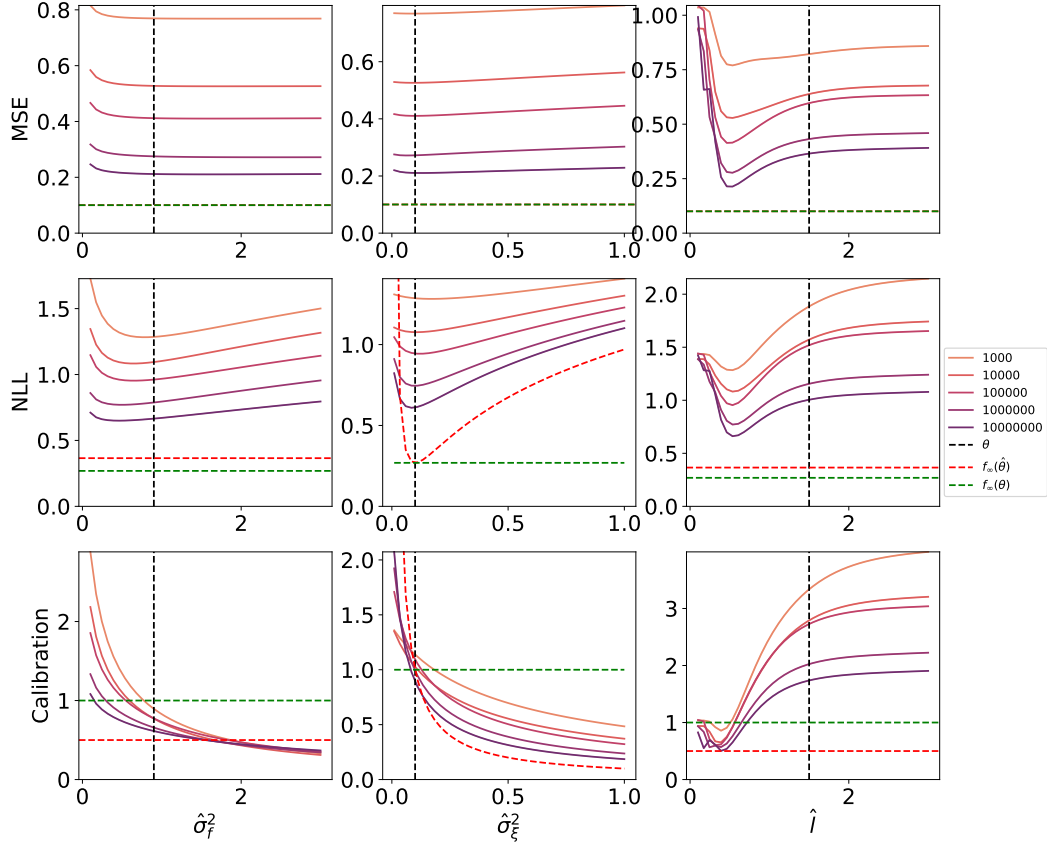

Figure 6: Behaviour of performance metrics as functions of kernel hyperparameters for increasing training set sizes  $n$ . The black dashed line denotes the true parameter value; the red dashed line shows the limiting behaviour as  $n \rightarrow \infty$  and the green dashed line shows the limiting behaviour when the hyperparameters are correct. Simulations run with  $d = 20, l = 0.5, \sigma_\xi^2 = 0.1, \sigma_f^2 = 0.9$ . Assumed parameters when constant:  $\hat{\sigma}_\xi^2 = 0.2, \hat{\sigma}_f^2 = 0.8, \hat{l} = 0.5$ .

## 562 F Further Results on UCI Datasets

### 563 F.1 Results for all distributed methods

Table 3: Results for all methods on all metrics.

| Dataset       | $n$     | $d$ | Model | Calibration                         | NLL                                  | RMSE                                   |
|---------------|---------|-----|-------|-------------------------------------|--------------------------------------|----------------------------------------|
| Bike          | 1.4e+04 | 13  | BCM   | $1.02 \pm 0.02$                     | $1.0 \pm 0.0065$                     | $0.66 \pm 0.0043$                      |
|               |         |     | GPOE  | $0.873 \pm 0.012$                   | $1.03 \pm 0.0069$                    | $0.664 \pm 0.0054$                     |
|               |         |     | GRBCM | $0.893 \pm 0.014$                   | $0.977 \pm 0.0057$                   | $0.634 \pm 0.004$                      |
|               |         |     | OURS  | $0.974 \pm 0.087$                   | $0.953 \pm 0.013$                    | $0.624 \pm 0.0079$                     |
|               |         |     | POE   | $1.03 \pm 0.022$                    | $1.01 \pm 0.0083$                    | $0.664 \pm 0.0054$                     |
|               |         |     | RBCM  | <b><math>1.01 \pm 0.02</math></b>   | $1.0 \pm 0.0065$                     | $0.659 \pm 0.0043$                     |
|               |         |     | SVGP  | $0.898 \pm 0.011$                   | <b><math>0.93 \pm 0.0043</math></b>  | <b><math>0.606 \pm 0.0033</math></b>   |
| Ctslice       | 4.2e+04 | 378 | BCM   | $5.04 \pm 0.28$                     | $1.43 \pm 0.13$                      | $0.311 \pm 0.0052$                     |
|               |         |     | GPOE  | $0.435 \pm 0.013$                   | $0.422 \pm 0.0015$                   | $0.347 \pm 0.0027$                     |
|               |         |     | GRBCM | $1.13 \pm 0.11$                     | $-0.159 \pm 0.052$                   | $0.237 \pm 0.012$                      |
|               |         |     | OURS  | <b><math>1.04 \pm 0.085</math></b>  | <b><math>-1.26 \pm 0.01</math></b>   | <b><math>0.132 \pm 0.00062</math></b>  |
|               |         |     | POE   | $6.39 \pm 0.27$                     | $2.08 \pm 0.12$                      | $0.347 \pm 0.0027$                     |
|               |         |     | RBCM  | $4.16 \pm 0.25$                     | $0.987 \pm 0.11$                     | $0.28 \pm 0.0048$                      |
|               |         |     | SVGP  | $0.865 \pm 0.026$                   | $0.467 \pm 0.016$                    | $0.384 \pm 0.0064$                     |
| Houseelectric | 1.6e+06 | 8   | BCM   | $1.27 \pm 0.0046$                   | $-1.33 \pm 0.0009$                   | $0.0634 \pm 3.5e-05$                   |
|               |         |     | GPOE  | $0.908 \pm 0.0065$                  | $-1.43 \pm 0.0016$                   | $0.0638 \pm 7.7e-05$                   |
|               |         |     | GRBCM | $1.25 \pm 0.011$                    | $-1.34 \pm 0.0039$                   | $0.063 \pm 0.00026$                    |
|               |         |     | OURS  | <b><math>1.08 \pm 0.21</math></b>   | <b><math>-1.56 \pm 0.0065</math></b> | <b><math>0.0506 \pm 0.00072</math></b> |
|               |         |     | POE   | $1.28 \pm 0.006$                    | $-1.32 \pm 0.0018$                   | $0.0638 \pm 7.7e-05$                   |
|               |         |     | RBCM  | $1.24 \pm 0.0054$                   | $-1.34 \pm 0.0013$                   | $0.0626 \pm 5.2e-05$                   |
|               |         |     | SVGP  | $0.911 \pm 0.038$                   | $-1.46 \pm 0.0046$                   | $0.0566 \pm 0.00011$                   |
| Poletele      | 4.6e+03 | 19  | BCM   | $1.07 \pm 0.029$                    | $0.00035 \pm 0.019$                  | $0.243 \pm 0.0048$                     |
|               |         |     | GPOE  | $0.917 \pm 0.02$                    | $0.0344 \pm 0.013$                   | $0.246 \pm 0.0038$                     |
|               |         |     | GRBCM | $0.872 \pm 0.024$                   | $0.0091 \pm 0.015$                   | $0.241 \pm 0.0033$                     |
|               |         |     | OURS  | <b><math>1.03 \pm 0.073</math></b>  | <b><math>-0.214 \pm 0.019</math></b> | <b><math>0.195 \pm 0.0042</math></b>   |
|               |         |     | POE   | $1.1 \pm 0.036$                     | $0.00772 \pm 0.016$                  | $0.246 \pm 0.0038$                     |
|               |         |     | RBCM  | $1.08 \pm 0.029$                    | $0.00309 \pm 0.018$                  | $0.243 \pm 0.0048$                     |
|               |         |     | SVGP  | $0.862 \pm 0.035$                   | $-0.0667 \pm 0.017$                  | $0.226 \pm 0.0059$                     |
| Protein       | 3.6e+04 | 9   | BCM   | $1.04 \pm 0.0097$                   | $1.14 \pm 0.003$                     | $0.754 \pm 0.0022$                     |
|               |         |     | GPOE  | $0.925 \pm 0.007$                   | $1.15 \pm 0.0035$                    | $0.763 \pm 0.0024$                     |
|               |         |     | GRBCM | $0.95 \pm 0.012$                    | $1.11 \pm 0.0051$                    | $0.733 \pm 0.0038$                     |
|               |         |     | OURS  | <b><math>0.991 \pm 0.029</math></b> | <b><math>1.01 \pm 0.0016</math></b>  | <b><math>0.666 \pm 0.0014</math></b>   |
|               |         |     | POE   | $1.07 \pm 0.0088$                   | $1.15 \pm 0.0033$                    | $0.763 \pm 0.0024$                     |
|               |         |     | RBCM  | $1.03 \pm 0.0096$                   | $1.13 \pm 0.003$                     | $0.752 \pm 0.0022$                     |
|               |         |     | SVGP  | $0.908 \pm 0.016$                   | $1.05 \pm 0.0059$                    | $0.688 \pm 0.0043$                     |
| Road3D        | 3.4e+05 | 2   | BCM   | $1.01 \pm 0.017$                    | $0.753 \pm 0.007$                    | $0.514 \pm 0.0035$                     |
|               |         |     | GPOE  | $0.756 \pm 0.012$                   | $0.819 \pm 0.0054$                   | $0.529 \pm 0.0037$                     |
|               |         |     | GRBCM | $0.873 \pm 0.011$                   | $0.685 \pm 0.0041$                   | $0.478 \pm 0.0023$                     |
|               |         |     | OURS  | <b><math>0.991 \pm 0.041</math></b> | <b><math>0.371 \pm 0.004</math></b>  | <b><math>0.351 \pm 0.0014</math></b>   |
|               |         |     | POE   | $1.07 \pm 0.019$                    | $0.783 \pm 0.0076$                   | $0.529 \pm 0.0037$                     |
|               |         |     | RBCM  | $0.976 \pm 0.016$                   | $0.735 \pm 0.0066$                   | $0.505 \pm 0.0034$                     |
|               |         |     | SVGP  | $0.9 \pm 0.00094$                   | $0.608 \pm 0.018$                    | $0.443 \pm 0.008$                      |
| Song          | 4.6e+05 | 90  | BCM   | $1.56 \pm 0.0063$                   | $1.32 \pm 0.0012$                    | $0.851 \pm 6.7e-05$                    |
|               |         |     | GPOE  | $0.926 \pm 0.00049$                 | $1.27 \pm 3.4e-05$                   | $0.864 \pm 7.5e-05$                    |
|               |         |     | GRBCM | $1.61 \pm 0.11$                     | $1.46 \pm 0.058$                     | $0.961 \pm 0.035$                      |
|               |         |     | OURS  | $0.99 \pm 0.037$                    | <b><math>1.18 \pm 0.0045</math></b>  | <b><math>0.787 \pm 0.0045</math></b>   |
|               |         |     | POE   | $1.61 \pm 0.0067$                   | $1.34 \pm 0.0013$                    | $0.864 \pm 7.5e-05$                    |
|               |         |     | RBCM  | $1.56 \pm 0.0062$                   | $1.31 \pm 0.0011$                    | $0.851 \pm 6.4e-05$                    |
|               |         |     | SVGP  | <b><math>0.991 \pm 0.02</math></b>  | $1.24 \pm 0.0012$                    | $0.834 \pm 0.0011$                     |

Table 4: Results on the UCI datasets using different kernel choices for our method and demonstrating the apparent superiority of the exponential kernel in these cases.

| Dataset       | $n$     | $d$ | Calibration       | Ours (Exp)                          | Ours (Matérn)                      | Ours (RBF)        | SVGP              |
|---------------|---------|-----|-------------------|-------------------------------------|------------------------------------|-------------------|-------------------|
|               |         |     | Distributed       |                                     |                                    |                   |                   |
| Poletele      | 4.6e+03 | 19  | 0.872 $\pm$ 0.024 | <b>0.994 <math>\pm</math> 0.15</b>  | 0.971 $\pm$ 0.13                   | 1.03 $\pm$ 0.073  | 0.862 $\pm$ 0.035 |
| Bike          | 1.4e+04 | 13  | 0.893 $\pm$ 0.014 | <b>0.988 <math>\pm</math> 0.098</b> | 0.971 $\pm$ 0.086                  | 0.974 $\pm$ 0.087 | 0.898 $\pm$ 0.011 |
| Protein       | 3.6e+04 | 9   | 0.95 $\pm$ 0.012  | <b>0.995 <math>\pm</math> 0.038</b> | 0.993 $\pm$ 0.031                  | 0.991 $\pm$ 0.029 | 0.908 $\pm$ 0.016 |
| Ctslice       | 4.2e+04 | 378 | 1.13 $\pm$ 0.11   | 0.912 $\pm$ 0.071                   | <b>1.04 <math>\pm</math> 0.082</b> | 1.04 $\pm$ 0.085  | 0.865 $\pm$ 0.026 |
| Road3D        | 3.4e+05 | 2   | 0.873 $\pm$ 0.011 | 1.09 $\pm$ 0.065                    | <b>1.0 <math>\pm</math> 0.054</b>  | 0.991 $\pm$ 0.041 | 0.9 $\pm$ 0.00094 |
| Song          | 4.6e+05 | 90  | 1.56 $\pm$ 0.0063 | <b>0.995 <math>\pm</math> 0.033</b> | 0.994 $\pm$ 0.035                  | 0.99 $\pm$ 0.037  | 0.991 $\pm$ 0.02  |
| Houseelectric | 1.6e+06 | 8   | 1.24 $\pm$ 0.0054 | 1.11 $\pm$ 0.29                     | <b>1.08 <math>\pm</math> 0.27</b>  | 1.08 $\pm$ 0.21   | 0.911 $\pm$ 0.038 |

  

| Dataset       | $n$     | $d$ | RMSE                 | Ours (Exp)                            | Ours (Matérn)       | Ours (RBF)           | SVGP                |
|---------------|---------|-----|----------------------|---------------------------------------|---------------------|----------------------|---------------------|
|               |         |     | Distributed          |                                       |                     |                      |                     |
| Poletele      | 4.6e+03 | 19  | 0.241 $\pm$ 0.0033   | <b>0.169 <math>\pm</math> 0.0076</b>  | 0.17 $\pm$ 0.0076   | 0.195 $\pm$ 0.0042   | 0.226 $\pm$ 0.0059  |
| Bike          | 1.4e+04 | 13  | 0.634 $\pm$ 0.004    | <b>0.565 <math>\pm</math> 0.0036</b>  | 0.6 $\pm$ 0.0044    | 0.624 $\pm$ 0.0079   | 0.606 $\pm$ 0.0033  |
| Protein       | 3.6e+04 | 9   | 0.733 $\pm$ 0.0038   | <b>0.58 <math>\pm</math> 0.0068</b>   | 0.629 $\pm$ 0.004   | 0.666 $\pm$ 0.0014   | 0.688 $\pm$ 0.0043  |
| Ctslice       | 4.2e+04 | 378 | 0.237 $\pm$ 0.012    | <b>0.123 <math>\pm</math> 0.004</b>   | 0.126 $\pm$ 0.0024  | 0.132 $\pm$ 0.00062  | 0.384 $\pm$ 0.0064  |
| Road3D        | 3.4e+05 | 2   | 0.478 $\pm$ 0.0023   | <b>0.0976 <math>\pm</math> 0.013</b>  | 0.27 $\pm$ 0.01     | 0.351 $\pm$ 0.0014   | 0.443 $\pm$ 0.008   |
| Song          | 4.6e+05 | 90  | 0.851 $\pm$ 6.7e-05  | <b>0.776 <math>\pm</math> 0.004</b>   | 0.778 $\pm$ 0.0045  | 0.787 $\pm$ 0.0045   | 0.834 $\pm$ 0.0011  |
| Houseelectric | 1.6e+06 | 8   | 0.0626 $\pm$ 5.2e-05 | <b>0.045 <math>\pm</math> 0.00025</b> | 0.0485 $\pm$ 0.0004 | 0.0506 $\pm$ 0.00072 | 0.0566 $\pm$ 0.0001 |

  

| Dataset       | $n$     | $d$ | NLL                | Ours (Exp)                           | Ours (Matérn)                       | Ours (RBF)         | SVGP                |
|---------------|---------|-----|--------------------|--------------------------------------|-------------------------------------|--------------------|---------------------|
|               |         |     | Distributed        |                                      |                                     |                    |                     |
| Poletele      | 4.6e+03 | 19  | 0.0091 $\pm$ 0.015 | <b>-0.397 <math>\pm</math> 0.028</b> | -0.346 $\pm$ 0.032                  | -0.214 $\pm$ 0.019 | -0.0667 $\pm$ 0.017 |
| Bike          | 1.4e+04 | 13  | 0.977 $\pm$ 0.0057 | <b>0.854 <math>\pm</math> 0.004</b>  | 0.915 $\pm$ 0.0077                  | 0.953 $\pm$ 0.013  | 0.93 $\pm$ 0.0043   |
| Protein       | 3.6e+04 | 9   | 1.11 $\pm$ 0.0051  | <b>0.853 <math>\pm</math> 0.013</b>  | 0.95 $\pm$ 0.0061                   | 1.01 $\pm$ 0.0016  | 1.05 $\pm$ 0.0059   |
| Ctslice       | 4.2e+04 | 378 | -0.159 $\pm$ 0.052 | -1.05 $\pm$ 0.027                    | <b>-1.31 <math>\pm</math> 0.017</b> | -1.26 $\pm$ 0.01   | 0.467 $\pm$ 0.016   |
| Road3D        | 3.4e+05 | 2   | 0.685 $\pm$ 0.0041 | <b>-0.931 <math>\pm</math> 0.14</b>  | 0.109 $\pm$ 0.039                   | 0.371 $\pm$ 0.004  | 0.608 $\pm$ 0.018   |
| Song          | 4.6e+05 | 90  | 1.32 $\pm$ 0.0012  | <b>1.16 <math>\pm</math> 0.0046</b>  | 1.17 $\pm$ 0.0051                   | 1.18 $\pm$ 0.0045  | 1.24 $\pm$ 0.0012   |
| Houseelectric | 1.6e+06 | 8   | -1.34 $\pm$ 0.0013 | <b>-1.95 <math>\pm</math> 0.028</b>  | -1.62 $\pm$ 0.0095                  | -1.56 $\pm$ 0.0065 | -1.46 $\pm$ 0.0046  |

## G Overall Computational Expenditure

Our distributed and variational method experiments were conducted using cloud computing resources. Experiments using our own method have been carried out on an author’s laptop. SVGP experiments were run using a SageMaker virtual machine on a single Nvidia Tesla V100 GPU with 16GB memory. Distributed method experiments were run using eight Intel Xeon Platinum 8000 CPU cores (t3.2xlarge EC2 instances).

Below we will attempt to give reasonable indications of the amount of computational work expended to obtain the results in this paper, though note that we are neglecting the work expended in the development and research stages that did not directly contribute to the runs in the paper. As such, the costs presented are representative of the costs of replicating our paper, not repeating the research from scratch. Instead of reporting costs in dollars, we will report approximate computing hours for each instance type. The reader can then estimate their own costs using the current instance costs in the region of their choice, or under other cloud providers or even using on-premise compute.

| Dataset       | Billed hours (1 GPU, 3 runs) | Billed hours (8 CPUs, 3 runs of 5 methods) |
|---------------|------------------------------|--------------------------------------------|
| bike          | 0.027                        | 0.222                                      |
| ctslice       | 0.082                        | 0.546                                      |
| houseelectric | 3.713                        | 256.776                                    |
| poletele      | 0.010                        | 0.079                                      |
| protein       | 0.068                        | 0.680                                      |
| road3d        | 0.635                        | 31.674                                     |
| song          | 0.904                        | 12.237                                     |

This gives a total of around 5.4 hours of compute time on a 1 GPU VM and 302.2 hours on an 8 CPU VM.

## References

- [1] F. Bachoc, N. Durrande, D. Rulli  re, and C. Chevalier. Properties and Comparison of Some Kriging Sub-model Aggregation Methods. *Mathematical Geosciences*, 2022.
- [2] Y. Cao and D. J. Fleet. Generalized product of experts for automatic and principled fusion of gaussian process predictions. *arXiv preprint arXiv:1410.7827*, 2014.
- [3] K. Chalupka, C. K. Williams, and I. Murray. A framework for evaluating approximation methods for gaussian process regression. *Journal of Machine Learning Research*, 14:333–350, 2013.
- [4] S. Cohen, R. Mbuva, T. Marwala, and M. Deisenroth. Healing products of Gaussian process experts. In H. D. III and A. Singh, editors, *Proceedings of the 37th International Conference on Machine Learning*, volume 119 of *Proceedings of Machine Learning Research*, pages 2068–2077. PMLR, 2020-13.
- [5] A. Datta, S. Banerjee, A. O. Finley, and A. E. Gelfand. Hierarchical Nearest-Neighbor Gaussian Process Models for Large Geostatistical Datasets. *Journal of the American Statistical Association*, 111(514):800–812, 2016.
- [6] A. Datta, S. Banerjee, A. O. Finley, and A. E. Gelfand. On nearest-neighbor Gaussian process models for massive spatial data. *Wiley Interdisciplinary Reviews: Computational Statistics*, 8(5):162–171, 2016.
- [7] M. Deisenroth and J. W. Ng. Distributed gaussian processes. In *International Conference on Machine Learning*, pages 1481–1490. PMLR, 2015.
- [8] J. Gardner, G. Pleiss, K. Q. Weinberger, D. Bindel, and A. G. Wilson. Gpytorch: Blackbox matrix-matrix gaussian process inference with gpu acceleration. *Advances in neural information processing systems*, 31, 2018.
- [9] L. Gy  rfi, M. Kohler, A. Krzy  ak, and H. Walk. *A Distribution-Free Theory of Nonparametric Regression*. Springer Series in Statistics, 2010.

- [10] K. Hayashi, M. Imaizumi, and Y. Yoshida. On random subsampling of gaussian process regression: A graphon-based analysis. In *International Conference on Artificial Intelligence and Statistics*, pages 2055–2065. PMLR, 2020.
- [11] J. Hensman, N. Fusi, and N. D. Lawrence. Gaussian processes for big data. *arXiv preprint arXiv:1309.6835*, 2013.
- [12] G. E. Hinton. Training products of experts by minimizing contrastive divergence. *Neural computation*, 14(8):1771–1800, 2002.
- [13] H. Liu, J. Cai, Y. Wang, and Y. S. Ong. Generalized robust bayesian committee machine for large-scale gaussian process regression. In *International Conference on Machine Learning*, pages 3131–3140. PMLR, 2018.
- [14] H. Liu, Y.-S. Ong, X. Shen, and J. Cai. When gaussian process meets big data: A review of scalable gps. *IEEE transactions on neural networks and learning systems*, 31(11):4405–4423, 2020.
- [15] J. E. Oakley and A. O’Hagan. Probabilistic sensitivity analysis of complex models: A bayesian approach. *Journal of the Royal Statistical Society. Series B (Statistical Methodology)*, 66(3):751–769, 2004.
- [16] F. Pedregosa, G. Varoquaux, A. Gramfort, V. Michel, B. Thirion, O. Grisel, M. Blondel, P. Prettenhofer, R. Weiss, V. Dubourg, J. Vanderplas, A. Passos, D. Cournapeau, M. Brucher, M. Perrot, and E. Duchesnay. Scikit-learn: Machine learning in Python. *Journal of Machine Learning Research*, 12:2825–2830, 2011.
- [17] B. Schölkopf. The Kernel Trick for Distances. In T. Leen, T. Dietterich, and V. Tresp, editors, *Advances in Neural Information Processing Systems*, volume 13. MIT Press, 2000.
- [18] H. Song, T. Diethe, M. Kull, and P. Flach. Distribution calibration for regression. *36th International Conference on Machine Learning, ICML 2019*, 2019-June:10347–10356, 2019.
- [19] M. L. Stein, Z. Chi, and L. J. Welty. Approximating likelihoods for large spatial data sets. *Journal of the Royal Statistical Society. Series B: Statistical Methodology*, 66(2):275–296, 2004.
- [20] A. Stephenson, R. Allison, and E. Pyzer-Knapp. Provably reliable large-scale sampling from gaussian processes. *arXiv preprint arXiv:2211.08036*, 2022.
- [21] S. Surjanovic and D. Bingham. Virtual library of simulation experiments: Test functions and datasets. Retrieved May 5, 2023, from <http://www.sfu.ca/~ssurjano>.
- [22] M. Titsias. Variational learning of inducing variables in sparse gaussian processes. In *Artificial intelligence and statistics*, pages 567–574. PMLR, 2009.
- [23] G.-L. Tran, D. Milios, P. Michiardi, and M. Filippone. Sparse within sparse gaussian processes using neighbor information. In M. Meila and T. Zhang, editors, *Proceedings of the 38th International Conference on Machine Learning*, volume 139 of *Proceedings of Machine Learning Research*, pages 10369–10378. PMLR, 2021-18.
- [24] V. Tresp. A bayesian committee machine. *Neural computation*, 12(11):2719–2741, 2000.
- [25] K. Wang, G. Pleiss, J. Gardner, S. Tyree, K. Q. Weinberger, and A. G. Wilson. Exact gaussian processes on a million data points. *Advances in Neural Information Processing Systems*, 32, 2019.
- [26] C. K. Williams and C. E. Rasmussen. *Gaussian processes for machine learning*, volume 2. MIT press Cambridge, MA, 2006.
- [27] L. Wu, G. Pleiss, and J. Cunningham. Variational Nearest Neighbor Gaussian Process. *Proceedings of the 39th International Conference on Machine Learning*, 2022.
